# Supplementary material
Source: PubMed Central journal article supplement (PMC6013830)
Supplement: NIHMS974622-supplement-SI.pdf [file NIHMS974622-supplement-SI.pdf]

# Supporting Information

## Bioinspired Photocatalytic Shark Skin Surfaces with Antibacterial and Antifouling Activity via Nanoimprint Lithography

*Feyza Dundar Arisoy*<sup>†</sup>, *Kristopher W. Kolewe*<sup>‡</sup>, *Benjamin Homyak*<sup>†</sup>, *Irene S. Kurtz*<sup>‡</sup>, *Jessica D. Schiffman*<sup>‡</sup>, *James J. Watkins*<sup>\*†</sup>

<sup>†</sup>Department of Polymer Science and Engineering, <sup>‡</sup>Department of Chemical Engineering, University of Massachusetts Amherst, Amherst, Massachusetts 01003, United States

\*E-mail: [watkins@polysci.umass.edu](mailto:watkins@polysci.umass.edu)

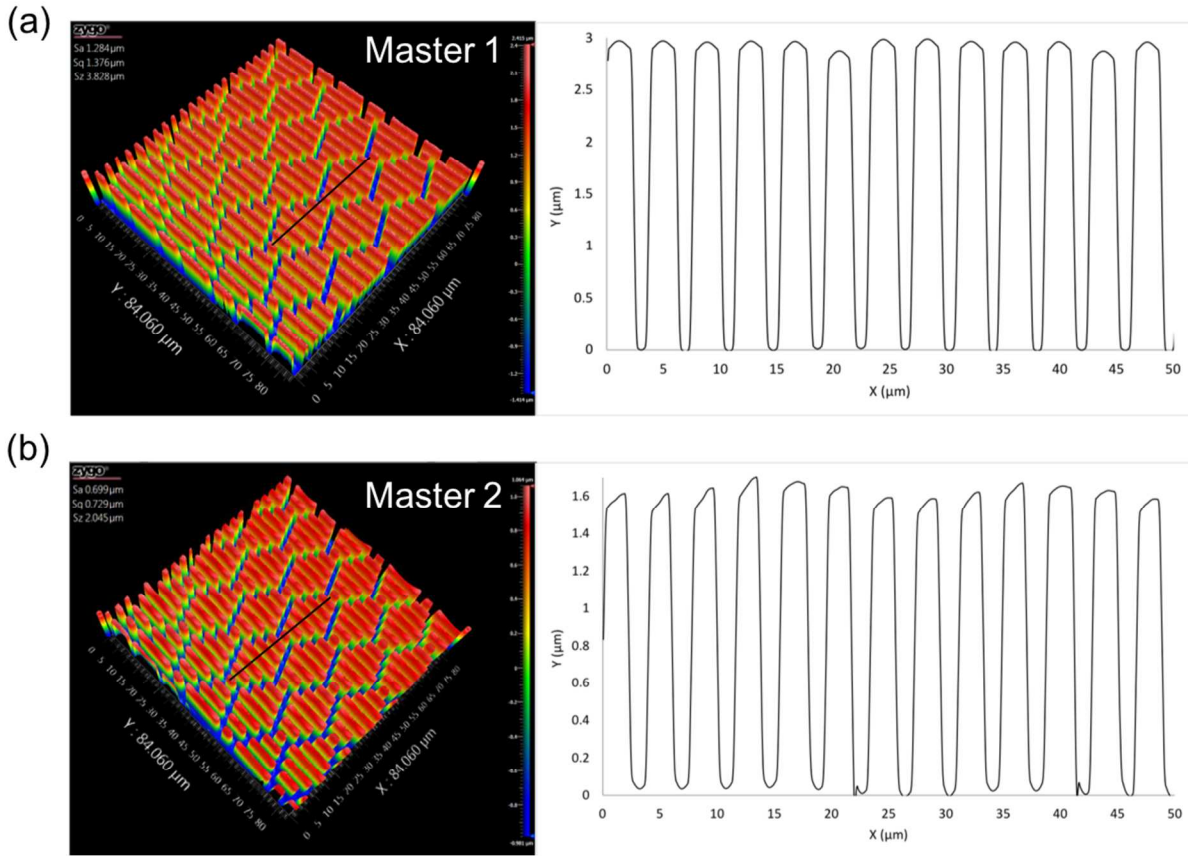

**Figure S1:** Optical profilometry images and dimensions of **(a)** *Master 1* (nickel mold) and **(b)** *Master 2* (TiO<sub>2</sub>-50 mold).

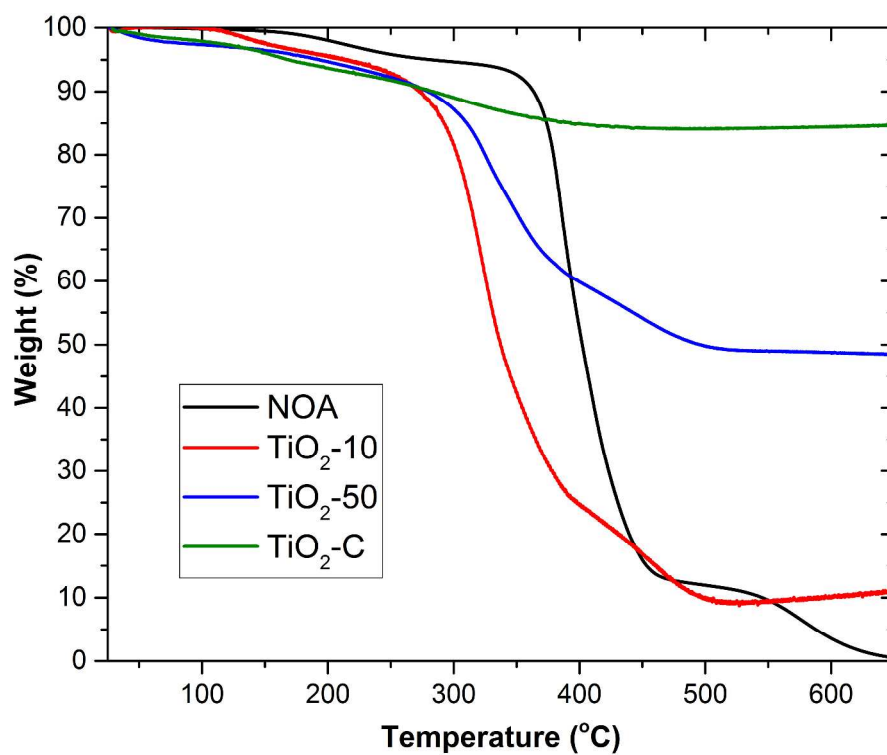

**Figure S2.** TGA of NOA, TiO<sub>2</sub>-10, TiO<sub>2</sub>-50, and TiO<sub>2</sub>-C.

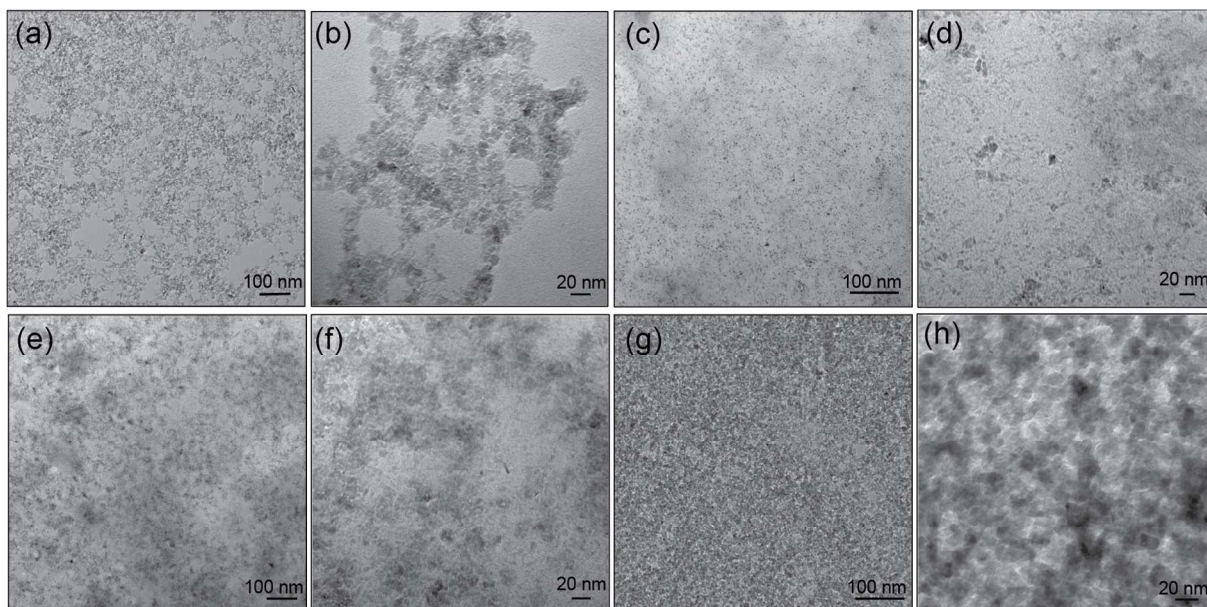

**Figure S3.** TEM images of low and high magnifications **(a, b)** TiO<sub>2</sub> NPs (drop casted from solvent exchanged TiO<sub>2</sub> (NMP/MeOH) dispersion), as well as the **(c, d)** TiO<sub>2</sub>-10, **(e, f)** TiO<sub>2</sub>-50, **(g, h)** TiO<sub>2</sub>-C composite films.

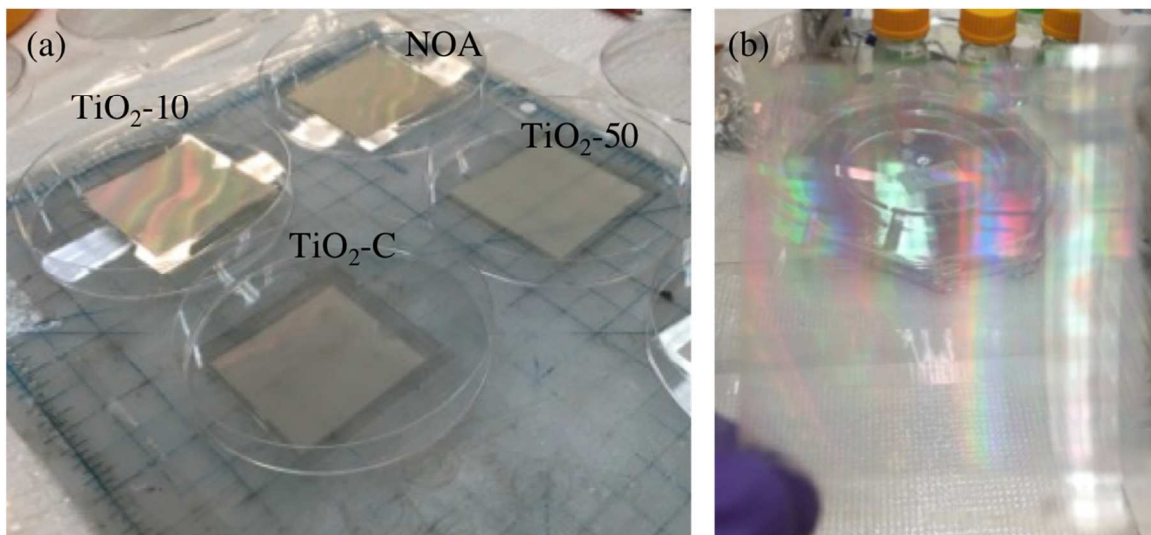

**Figure S4. (a, b)** Digital photos of NOA, TiO<sub>2</sub>-10, TiO<sub>2</sub>-50, and TiO<sub>2</sub>-C shark skin patterns on a PET substrate (4 cm × 4 cm).

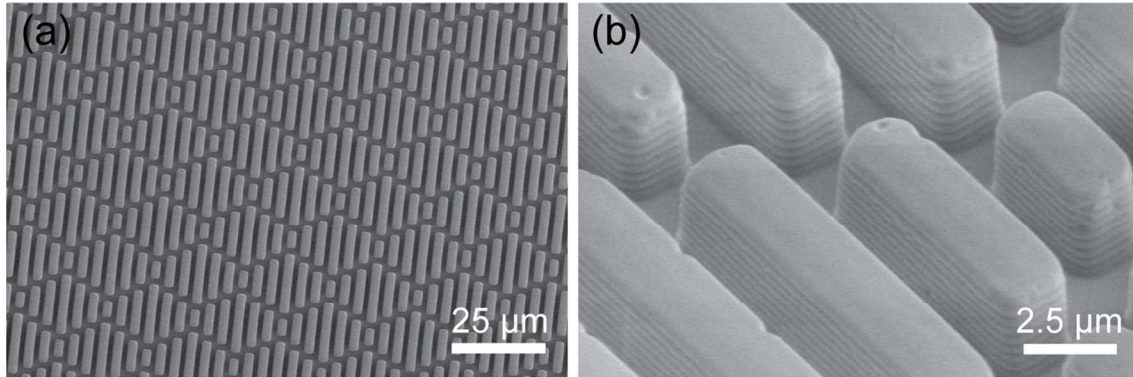

**Figure S5.** SEM micrographs of NOA\* (100% NOA) shark skin surfaces as a control patterned surface **(a)** top view, **(b)** 45° tilted. Imprints were conducted using a PDMS mold from *Master 1* (height: 3 μm, width: 2 μm, pitch: 4 μm).

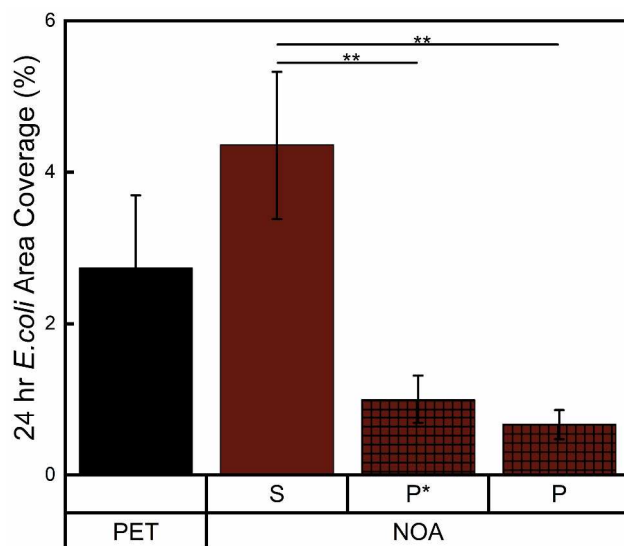

**Figure S6.** The total area coverage of surface-adhered *E. coli* on smooth (S) and patterned (P) NOA surfaces, as well as on PET controls. The dimensions of NOA (P) surfaces are height: 1.6  $\mu\text{m}$ , width: 1.3  $\mu\text{m}$ , and spacing: 2.7  $\mu\text{m}$ , whereas NOA\* (P\*) dimensions are height: 3  $\mu\text{m}$ , width: 2  $\mu\text{m}$ , and spacing: 2  $\mu\text{m}$ . Two asterisks (\*\*) indicates that values are significantly different at 0.01 level. Standard error is provided.

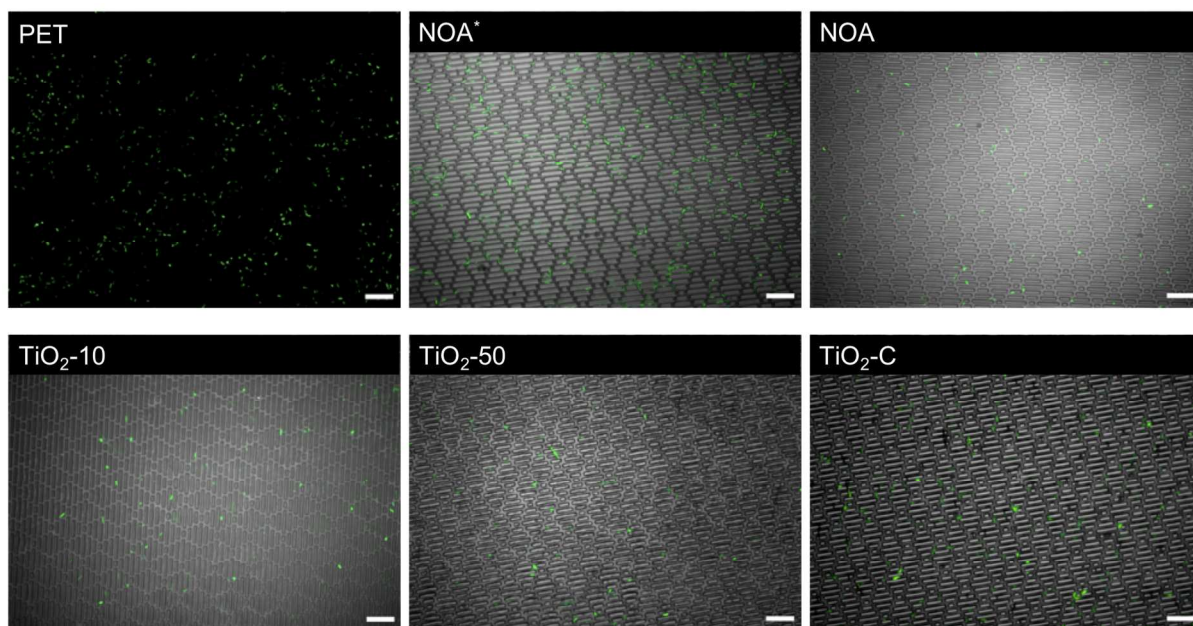

**Figure S7.** Fluorescent micrographs show that *E. coli* adhered between the patterned features. All scale bars are 20  $\mu\text{m}$ .
